# Supplementary material for: Spectrophotometric Determination of Formation Constants of Iron(III) Complexes with Several Ligands
Source: MDPI journal article supplement (doi:10.3390/chemistry4030050), 2022-07-15
Supplement: s1 [file s1]

MATERIAL SUPPORTING TO

# Spectrophotometric Determination of Formation Constants of Iron(III) Complexes with Several Ligands

José J. N. Segoviano-Garfias <sup>1,\*</sup>, Gabriela A. Zanor <sup>1</sup>, Fidel Ávila-Ramos <sup>1</sup>, Eglá Yareth Bivián-Castro <sup>2</sup> and Carlos A. Rubio-Jiménez <sup>1</sup>

<sup>1</sup> División de Ciencias de la Vida (DICIVA). Universidad de Guanajuato. Campus Irapuato-Salamanca. Ex Hacienda El Copal, Carretera Irapuato-Silao Km. 9, Irapuato 36500, Mexico; gzanor@ugto.mx (G.A.Z.); ledifar@ugto.mx (F.Á.-R.); carlos.rubio@ugto.mx (C.A.R.-J.)

<sup>2</sup> Centro Universitario de los Lagos, Universidad de Guadalajara, Enrique Díaz de León 1144, Col. Paseos de la Montaña, Lagos de Moreno 47460, Mexico; eglá.bivian@academicos.udg.mx

\* Correspondence: segovi@ugto.mx; Tel.: +52-(473)-740-5320.

**Table S1.** Summary of experimental parameters for the systems  $\text{Fe}^{3+}$  with ethylenediamine (*en*), 1,3-diaminopropane (*pn*) and 1,4-diaminopropane (*bn*) in methanol.

|                                      |                                                                                                                                                                                                                     |                                   |        |
|--------------------------------------|---------------------------------------------------------------------------------------------------------------------------------------------------------------------------------------------------------------------|-----------------------------------|--------|
| Solution composition                 | [T <sub>L</sub> ] range from 11.9 to 238.0 and 104.8 to 419.3 μmol L <sup>-1</sup><br>[T <sub>M</sub> ] constant at 118.8 and 198 μmol L <sup>-1</sup><br>Ionic strength, electrolyte Not used<br>pH range Not used |                                   |        |
| Experimental method                  | Spectrophotometric titration                                                                                                                                                                                        |                                   |        |
| Temperature                          | 298 K                                                                                                                                                                                                               |                                   |        |
| Total number of data points          | Fe complexation: 28 solution spectra                                                                                                                                                                                |                                   |        |
| Method of calculation                | HypSpec                                                                                                                                                                                                             |                                   |        |
| Species                              | Equilibrium                                                                                                                                                                                                         | Log β                             | σ      |
| [Fe(en)] <sup>3+</sup>               | Fe <sup>3+</sup> + en ⇌ [Fe(en)] <sup>3+</sup>                                                                                                                                                                      | log β <sub>110</sub> = 5.3 ± 0.2  | 0.0017 |
| [Fe(en) <sub>2</sub> ] <sup>3+</sup> | Fe <sup>3+</sup> +2 en ⇌ [Fe(en) <sub>2</sub> ] <sup>3+</sup>                                                                                                                                                       | log β <sub>120</sub> = 10.9 ± 0.1 |        |
| Solution composition                 | [T <sub>L</sub> ] range from 13.2 to 263.6 and 63.2 to 421.6 μmol L <sup>-1</sup><br>[T <sub>M</sub> ] constant at 118.8 and 198 μmol L <sup>-1</sup><br>Ionic strength, electrolyte Not used<br>pH range Not used  |                                   |        |
| Experimental method                  | Spectrophotometric titration                                                                                                                                                                                        |                                   |        |
| Temperature                          | 298 K                                                                                                                                                                                                               |                                   |        |
| Total number of data points          | Fe complexation: 29 solution spectra                                                                                                                                                                                |                                   |        |
| Method of calculation                | HypSpec                                                                                                                                                                                                             |                                   |        |
| Species                              | Equilibrium                                                                                                                                                                                                         | Log β                             | σ      |
| [Fe(pn)] <sup>3+</sup>               | Fe <sup>3+</sup> + pn ⇌ [Fe(pn)] <sup>3+</sup>                                                                                                                                                                      | log β <sub>110</sub> = 6.9 ± 0.2  | 0.0072 |
| [Fe(pn) <sub>2</sub> ] <sup>3+</sup> | Fe <sup>3+</sup> +2 pn ⇌ [Fe(pn) <sub>2</sub> ] <sup>3+</sup>                                                                                                                                                       | log β <sub>120</sub> = 12.4 ± 0.1 |        |
| Solution composition                 | [T <sub>L</sub> ] range from 11.9 to 202.9 and 23.9 to 406.0 μmol L <sup>-1</sup><br>[T <sub>M</sub> ] constant at 118.8 and 198 μmol L <sup>-1</sup><br>Ionic strength, electrolyte Not used<br>pH range Not used  |                                   |        |
| Experimental method                  | Spectrophotometric titration                                                                                                                                                                                        |                                   |        |
| Temperature                          | 298 K                                                                                                                                                                                                               |                                   |        |
| Total number of data points          | Fe complexation: 29 solution spectra                                                                                                                                                                                |                                   |        |
| Method of calculation                | HypSpec                                                                                                                                                                                                             |                                   |        |
| Species                              | Equilibrium                                                                                                                                                                                                         | Log β                             | σ      |
| [Fe(bn)] <sup>3+</sup>               | Fe <sup>3+</sup> + bn ⇌ [Fe(bn)] <sup>3+</sup>                                                                                                                                                                      | log β <sub>110</sub> = 5.2 ± 0.1  | 0.0057 |
| [Fe(bn) <sub>2</sub> ] <sup>3+</sup> | Fe <sup>3+</sup> +2 bn ⇌ [Fe(bn) <sub>2</sub> ] <sup>3+</sup>                                                                                                                                                       | log β <sub>120</sub> = 10.2 ± 0.1 |        |

**Table S2.** Summary of experimental parameters for the systems  $\text{Fe}^{3+}$  with 2,2'-bipyridyl(*bipy*), 5,5'-dimethyl-2,2'-bipyridyl (*dmbipy*) and 4,4'-di-tert-butyl-2,2'-bipyridyl (*dtbbipy*) in methanol.

| Solution composition                 | [T <sub>L</sub> ] range from 3.072 to 30.72 and 4.6 to 92 $\mu\text{mol L}^{-1}$<br>[T <sub>M</sub> ] constant at 9.9 and 29.64 $\mu\text{mol L}^{-1}$<br>Ionic strength, electrolyte<br>pH range     |                                   |          | Not used<br>Not used |
|--------------------------------------|-------------------------------------------------------------------------------------------------------------------------------------------------------------------------------------------------------|-----------------------------------|----------|----------------------|
| Experimental method                  | Spectrophotometric titration                                                                                                                                                                          |                                   |          |                      |
| Temperature                          | 298 K                                                                                                                                                                                                 |                                   |          |                      |
| Total number of data points          | Fe complexation: 37 solution spectra                                                                                                                                                                  |                                   |          |                      |
| Method of calculation                | HypSpec                                                                                                                                                                                               |                                   |          |                      |
| Species                              | Equilibrium                                                                                                                                                                                           | Log $\beta$                       | $\sigma$ |                      |
| $[\text{Fe}(\text{Bipy})]^{3+}$      | $\text{Fe}^{3+} + \text{Bipy} \rightleftharpoons [\text{Fe}(\text{Bipy})]^{3+}$                                                                                                                       | $\log \beta_{110} = 5.2 \pm 0.1$  | 0.0040   |                      |
| $[\text{Fe}(\text{Bipy})_2]^{3+}$    | $\text{Fe}^{3+} + 2 \text{Bipy} \rightleftharpoons [\text{Fe}(\text{Bipy})_2]^{3+}$                                                                                                                   | $\log \beta_{120} = 10.3 \pm 0.1$ |          |                      |
| $[\text{Fe}(\text{Bipy})_3]^{3+}$    | $\text{Fe}^{3+} + 3 \text{Bipy} \rightleftharpoons [\text{Fe}(\text{Bipy})_3]^{3+}$                                                                                                                   | $\log \beta_{130} = 15.0 \pm 0.1$ |          |                      |
| Solution composition                 | [T <sub>L</sub> ] range from 1.04 to 20.8 and 2.08 to 41.6 $\mu\text{mol L}^{-1}$<br>[T <sub>M</sub> ] constant at 9.9 and 19.8 $\mu\text{mol L}^{-1}$<br>Ionic strength, electrolyte<br>pH range     |                                   |          | Not used<br>Not used |
| Experimental method                  | Spectrophotometric titration                                                                                                                                                                          |                                   |          |                      |
| Temperature                          | 298 K                                                                                                                                                                                                 |                                   |          |                      |
| Total number of data points          | Fe complexation: 40 solution spectra                                                                                                                                                                  |                                   |          |                      |
| Method of calculation                | HypSpec                                                                                                                                                                                               |                                   |          |                      |
| Species                              | Equilibrium                                                                                                                                                                                           | Log $\beta$                       | $\sigma$ |                      |
| $[\text{Fe}(\text{dmBipy})]^{3+}$    | $\text{Fe}^{3+} + \text{dmBipy} \rightleftharpoons [\text{Fe}(\text{dmBipy})]^{3+}$                                                                                                                   | $\log \beta_{110} = 5.8 \pm 0.1$  | 0.0063   |                      |
| $[\text{Fe}(\text{dmBipy})_2]^{3+}$  | $\text{Fe}^{3+} + 2 \text{dmBipy} \rightleftharpoons [\text{Fe}(\text{dmBipy})_2]^{3+}$                                                                                                               | $\log \beta_{120} = 11.0 \pm 0.1$ |          |                      |
| Solution composition                 | [T <sub>L</sub> ] range from 2.086 to 20.86 and 2.086 to 41.72 $\mu\text{mol L}^{-1}$<br>[T <sub>M</sub> ] constant at 9.9 and 19.8 $\mu\text{mol L}^{-1}$<br>Ionic strength, electrolyte<br>pH range |                                   |          | Not used<br>Not used |
| Experimental method                  | Spectrophotometric titration                                                                                                                                                                          |                                   |          |                      |
| Temperature                          | 298 K                                                                                                                                                                                                 |                                   |          |                      |
| Total number of data points          | Fe complexation: 39 solution spectra                                                                                                                                                                  |                                   |          |                      |
| Method of calculation                | HypSpec                                                                                                                                                                                               |                                   |          |                      |
| Species                              | Equilibrium                                                                                                                                                                                           | Log $\beta$                       | $\sigma$ |                      |
| $[\text{Fe}(\text{dtbBipy})]^{2+}$   | $\text{Fe}^{3+} + \text{dtbBipy} \rightleftharpoons [\text{Fe}(\text{dtbBipy})]^{2+}$                                                                                                                 | $\log \beta_{110} = 6.5 \pm 0.1$  | 0.0044   |                      |
| $[\text{Fe}(\text{dtbBipy})_2]^{2+}$ | $\text{Fe}^{3+} + 2 \text{dtbBipy} \rightleftharpoons [\text{Fe}(\text{dtbBipy})_2]^{2+}$                                                                                                             | $\log \beta_{120} = 12.2 \pm 0.1$ |          |                      |

**Table S3.** Summary of experimental parameters for the systems  $\text{Fe}^{3+}$  with 1,10-phenanthroline (*phen*) and 3,4,7,8-tetramethyl-1,10-phenanthroline (*tmPhen*) in methanol.

| Solution composition                     |                                                                       | [T <sub>L</sub> ] range from 0.73 to 14.6 and 0.955 to 19.1 μmol L <sup>-1</sup><br>[T <sub>M</sub> ] constant at 4.74 and 5.9 μmol L <sup>-1</sup><br>Ionic strength, electrolyte<br>pH range        |  | Not used<br>Not used |
|------------------------------------------|-----------------------------------------------------------------------|-------------------------------------------------------------------------------------------------------------------------------------------------------------------------------------------------------|--|----------------------|
| Experimental method                      |                                                                       | Spectrophotometric titration                                                                                                                                                                          |  |                      |
| Temperature                              |                                                                       | 298 K                                                                                                                                                                                                 |  |                      |
| Total number of data points              |                                                                       | Fe complexation: 39 solution spectra                                                                                                                                                                  |  |                      |
| Method of calculation                    |                                                                       | HypSpec                                                                                                                                                                                               |  |                      |
| Species                                  | Equilibrium                                                           | Log β                                                                                                                                                                                                 |  | σ                    |
| [Fe(Phen)] <sup>3+</sup>                 | Fe <sup>3+</sup> + Phen ⇌ [Fe(Phen)] <sup>3+</sup>                    | log β <sub>110</sub> = 6.1 ± 0.1                                                                                                                                                                      |  | 0.0071               |
| [Fe(Phen) <sub>2</sub> ] <sup>3+</sup>   | Fe <sup>3+</sup> +2 Phen ⇌ [Fe(Phen) <sub>2</sub> ] <sup>3+</sup>     | log β <sub>120</sub> = 12.2 ± 0.1                                                                                                                                                                     |  |                      |
| [Fe(Phen) <sub>3</sub> ] <sup>3+</sup>   | Fe <sup>3+</sup> +3 Phen ⇌ [Fe(Phen) <sub>3</sub> ] <sup>3+</sup>     | log β <sub>130</sub> = 17.6 ± 0.1                                                                                                                                                                     |  |                      |
| Solution composition                     |                                                                       | [T <sub>L</sub> ] range from 0.305 to 6.092 and 0.609 to 12.184 μmol L <sup>-1</sup><br>[T <sub>M</sub> ] constant at 2.934 and 5.868 μmol L <sup>-1</sup><br>Ionic strength, electrolyte<br>pH range |  | Not used<br>Not used |
| Experimental method                      |                                                                       | Spectrophotometric titration                                                                                                                                                                          |  |                      |
| Temperature                              |                                                                       | 298 K                                                                                                                                                                                                 |  |                      |
| Total number of data points              |                                                                       | Fe complexation: 40 solution spectra                                                                                                                                                                  |  |                      |
| Method of calculation                    |                                                                       | HypSpec                                                                                                                                                                                               |  |                      |
| Species                                  | Equilibrium                                                           | Log β                                                                                                                                                                                                 |  | σ                    |
| [Fe(tmPhen)] <sup>3+</sup>               | Fe <sup>3+</sup> + tmPhen ⇌ [Fe(tmPhen)] <sup>3+</sup>                | log β <sub>110</sub> = 5.4 ± 0.1                                                                                                                                                                      |  | 0.0038               |
| [Fe(tmPhen) <sub>2</sub> ] <sup>3+</sup> | Fe <sup>3+</sup> +2 tmPhen ⇌ [Fe(tmPhen) <sub>2</sub> ] <sup>3+</sup> | log β <sub>120</sub> = 10.6 ± 0.1                                                                                                                                                                     |  |                      |

**Table S4.** Equilibrium constants for Fe<sup>3+</sup> systems with 2,2'- bipyridine and 1,10-phenanthroline, under different conditions.

| Method              | Solvent | Ionic<br>Strength          | T(°C) | Logβ <sub>110</sub> | Logβ <sub>120</sub> | Logβ <sub>130</sub> | Reference |
|---------------------|---------|----------------------------|-------|---------------------|---------------------|---------------------|-----------|
| 2,2'-bipyridine     |         |                            |       |                     |                     |                     |           |
| Espectrophotometric | Water   | –                          | 25    | –                   | –                   | 17.39               | [37]      |
| Potentiometric      | Water   | 0.1 M<br>NaNO <sub>3</sub> | 25    | 9.13                | 18.11               | –                   | [36]      |
| 1,10-phenanthroline |         |                            |       |                     |                     |                     |           |
| Potentiometric      | –       | –                          | 25    | 6.5                 | 11.4                |                     | [38]      |
| Potentiometric      | Agua    | 0.1 M<br>NaNO <sub>3</sub> | 25    | 10.41               | 19.92               | –                   | [36]      |

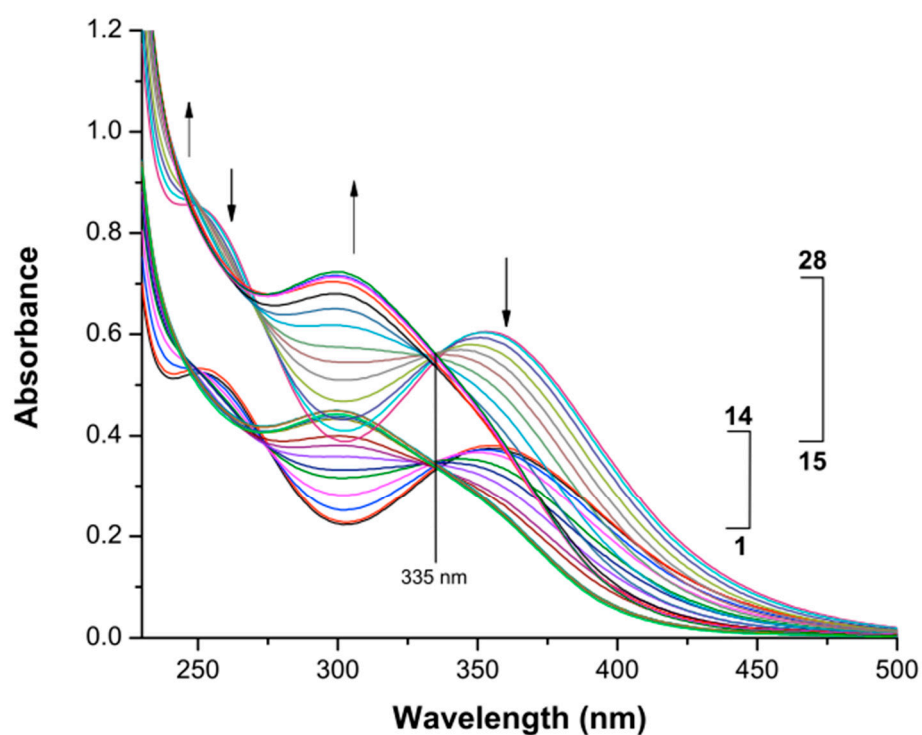

**Figure S1.** Absorption spectra of iron(III)-ethylenediamine complexes in methanol solution, with an isosbestic point at 335 nm For spectra 1 to 14,  $[\text{Fe(III)}] = 118.8 \mu\text{M}$  and ethylenediamine concentration ( $\mu\text{M}$ ): (1) 11.9; (2) 23.8; (3) 71.4; (4) 95.2; (5) 119.0; (6) 130.9; (7) 142.8; (8) 154.7; (9) 166.6; (10) 190.4; (11) 202.3; (12) 214.2; (13) 226.1; (14) 238.0. For spectra 15 to 28,  $[\text{Fe(III)}] = 198 \mu\text{M}$  and ethylenedimine concentration ( $\mu\text{M}$ ): (15) 104.8; (16) 125.8; (17) 146.7; (18) 167.7; (19) 188.6; (20) 209.6; (21) 230.6; (22) 251.5; (23) 272.5; (24) 293.4; (25) 314.4; (26) 377.3; (27) 398.2; (28) 419.2.

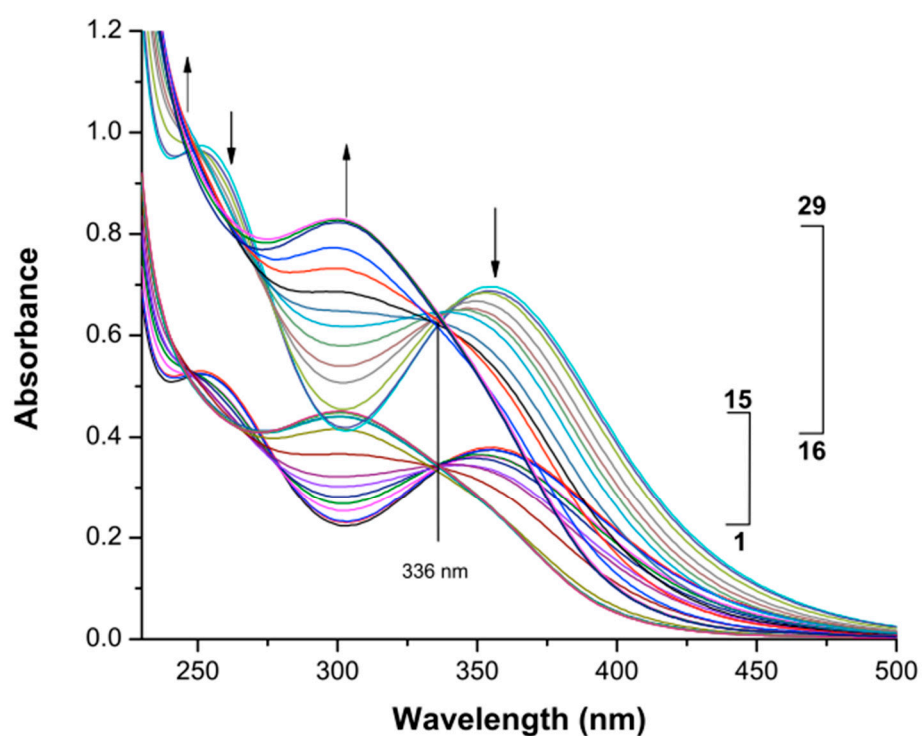

**Figure S2.** Absorption spectra of iron(III)-1,3-diaminopropane complexes in methanol solution, with an isosbestic point at 336 nm. For spectra 1 to 15,  $[\text{Fe(III)}] = 118.8 \mu\text{M}$  and 1,3-diaminopropane concentration ( $\mu\text{M}$ ): (1) 13.2; (2) 26.4; (3) 39.5; (4) 79.1; (5) 92.3; (6) 105.4; (7) 118.6; (8) 131.8; (9) 158.2; (10) 184.5; (11) 210.9; (12) 224.1; (13) 237.2; (14) 250.4; (15) 263.6. For spectra 16 to 29,  $[\text{Fe(III)}] = 198 \mu\text{M}$  and 1,3-diaminopropane concentration from ( $\mu\text{M}$ ): (16) 63.2; (17) 105.4 (18) 147.6; (19) 189.7; (20) 210.8; (21) 231.9; (22) 253.0; (23) 274.0; (24) 295.1; (25) 316.2; (26) 337.3; (27) 379.4; (28) 400.5; (29) 421.6.

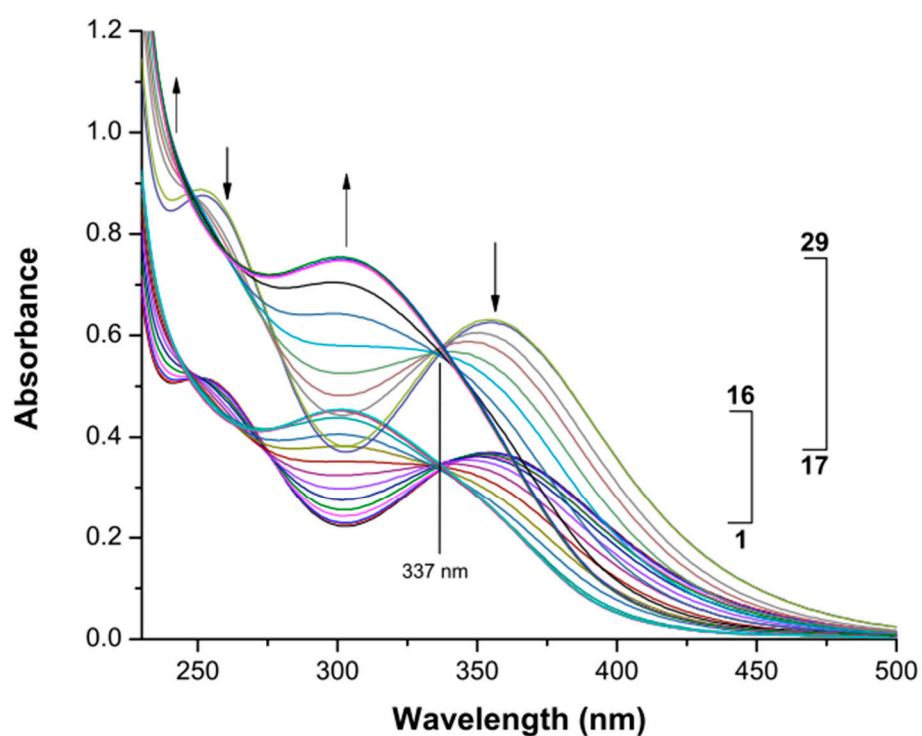

**Figure S3.** Absorption spectra of iron(III)-1,4-diaminobutane complexes in methanol solution, with an isosbestic point at 337 nm. For spectral 1 to 16,  $[\text{Fe(III)}] = 0.16\mu\text{M}$  and 1,4-diaminobutane concentration ( $\mu\text{M}$ ): (1)11.9; (2)23.9; (3) 35.8; (4) 48.8; (5) 59.7; (6) 71.6; (7) 83.6; (8) 95.5; (9) 107.5; (10) 119.4; (11) 131.3; (12) 143.3; (13) 167.2; (14) 179.1; (15) 191.1; (16) 202.9. For spectra 17 to 29,  $[\text{Fe(III)}] = 198\mu\text{M}$  and 1,4-diaminobutane concentration ( $\mu\text{M}$ ): (17) 23.9; (18) 47.8; (19) 119.4; (20) 143.3; (21) 167.2; (22) 191.0; (23) 214.9; (24) 238.8; (25) 310.4; (26) 334.3; (27) 358.2; (28) 382.1; (29) 406.0.



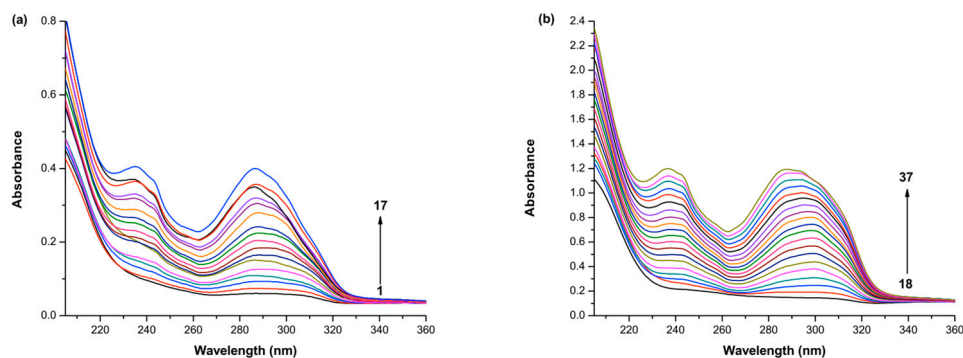

**Figure S4.** Absorption spectra of iron(III)–2,2'-bipyridyl complex in methanol solution. **(a)** For spectra 1 to 17,  $[\text{Fe(III)}] = 9.9 \mu\text{M}$  and 2,2'-bipyridyl concentration ( $\mu\text{M}$ ): (1) 3.072; (2) 4.608; (3) 6.144; (4) 7.68; (5) 9.216; (6) 10.752; (7) 12.288; (8) 13.824; (9) 15.36; (10) 16.896; (11) 18.432; (12) 21.504; (13) 23.04; (14) 24.576; (15) 26.112; (16) 27.648; (17) 30.72. **(b)** For spectra 18 to 37,  $[\text{Fe(III)}] = 29.64 \mu\text{M}$  and 2,2'-Bipyridyl concentration ( $\mu\text{M}$ ): (18) 4.6; (19) 9.2; (20) 13.8; (21) 18.4; (22) 23; (23) 27.6; (24) 32.2; (25) 36.8; (26) 41.4; (27) 46; (28) 50.6; (29) 55.2; (30) 59.8; (31) 64.4; (32) 69; (33) 73.6; (34) 78.2; (35) 82.8; (36) 87.4; (37) 92.

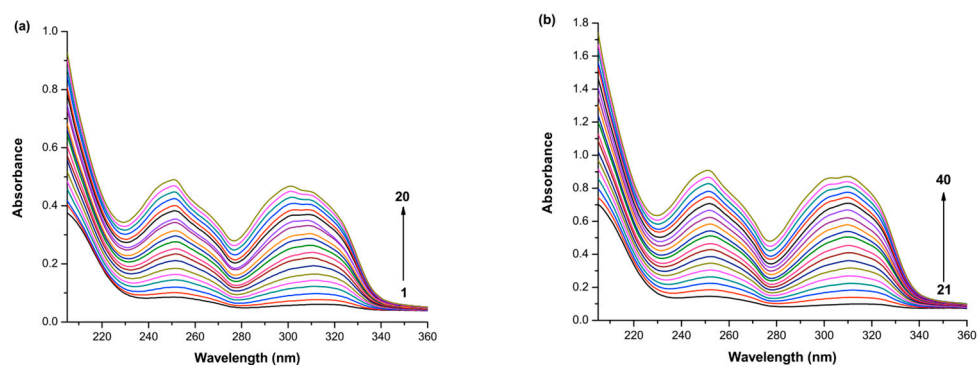

**Figure S5.** Absorption spectra of iron(III)–5,5-dimethyl-2,2'-bipyridyl complex in methanol solution. **(a)** For spectra 1 to 20,  $[\text{Fe(III)}] = 9.9 \mu\text{M}$  and 5,5-dimethyl-2,2'-bipyridyl concentration ( $\mu\text{M}$ ): (1) 1.04; (2) 2.08; (3) 3.12; (4) 4.16; (5) 5.2; (6) 6.24; (7) 7.28; (8) 8.32; (9) 9.36; (10) 10.4; (11) 11.44; (12) 12.48; (13) 13.52; (14) 14.56; (15) 15.6; (16) 16.64; (17) 17.68; (18) 18.72; (19) 19.76; (20) 20.8. **(b)** For spectra 21 to 40,  $[\text{Fe(III)}] = 19.8 \mu\text{M}$  and 5,5-dimethyl-2,2'-Bipyridyl concentration ( $\mu\text{M}$ ): (21) 2.08; (22) 4.16; (23) 6.24; (24) 8.32; (25) 10.4; (26) 12.48; (27) 14.56; (28) 16.64; (29) 18.72; (30) 20.8; (31) 22.88; (32) 24.96; (33) 27.04; (34) 29.12; (35) 31.2; (36) 33.28; (37) 35.36; (38) 37.44; (39) 39.52; (40) 41.6.

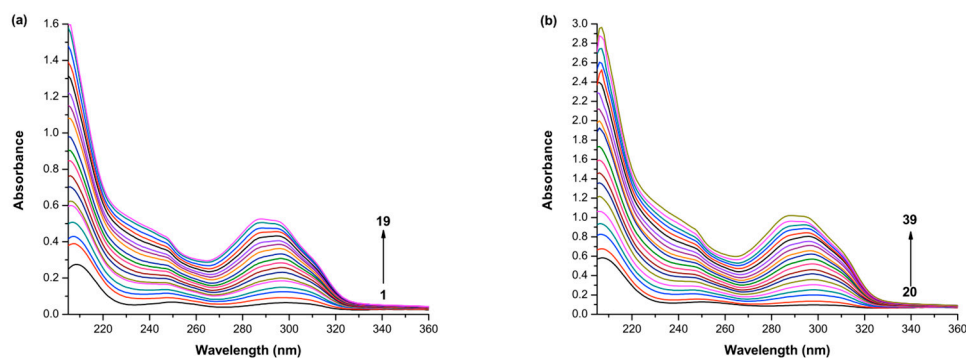

**Figure S6.** Absorption spectra of iron(III)-4,4'-di-tert-butyl-2,2'-bipyridyl complex in methanol solution. **(a)** For spectra 1 to 20,  $[\text{Fe(III)}] = 9.9 \mu\text{M}$  and 4,4'-di-tert-butyl-2,2'-bipyridyl concentration ( $\mu\text{M}$ ): (1) 2.086; (2) 3.129; (3) 4.172; (4) 5.215; (5) 6.258; (6) 7.301; (7) 8.344; (8) 9.387; (9) 10.43; (10) 11.473; (11) 12.516; (12) 13.559; (13) 14.602; (14) 15.645; (15) 16.688; (16) 17.731; (17) 18.774; (18) 19.817; (19) 20.86. **(b)** For spectra 20 to 39,  $[\text{Fe(III)}] = 19.8 \mu\text{M}$  and 4,4'-di-tert-butyl-2,2'-bipyridyl concentration ( $\mu\text{M}$ ): (20) 2.086; (21) 4.172; (22) 6.258; (23) 8.344; (24) 10.43; (25) 12.516; (26) 14.602; (27) 16.688; (28) 18.774; (29) 20.86; (30) 22.946; (31) 25.032; (32) 27.118; (33) 29.204; (34) 31.29; (35) 33.376; (36) 35.462; (37) 37.548; (38) 39.634; (39) 41.72.

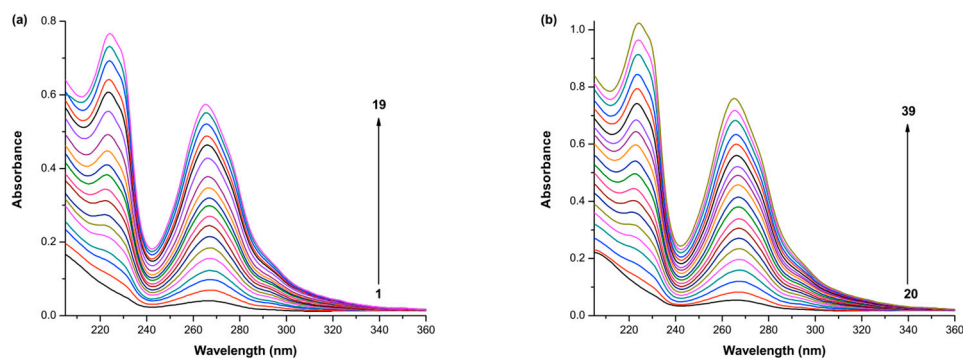

**Figure S7.** Absorption spectra of iron(III)–1,10-Phenanthroline complex in methanol solution. **(a)** For spectra 1 to 19,  $[\text{Fe(III)}] = 4.74 \mu\text{M}$  and 1,10-Phenanthroline concentration ( $\mu\text{M}$ ): (1) 0.73; (2) 1.46; (3) 2.19; (4) 2.92; (5) 3.65; (6) 4.38; (7) 5.11; (8) 5.84; (9) 6.57; (10) 7.3; (11) 8.03; (12) 8.76; (13) 9.49; (14) 10.95; (15) 11.68; (16) 12.41; (17) 13.14; (18) 13.87; (19) 14.6. **(b)** For spectra 20 to 39,  $[\text{Fe(III)}] = 5.9 \mu\text{M}$  and 1,10-Phenanthroline concentration ( $\mu\text{M}$ ): (20) 0.955; (21) 1.91; (22) 2.865; (23) 3.82; (24) 4.775; (25) 5.73; (26) 6.685; (27) 7.64; (28) 8.595; (29) 9.55; (30) 10.505; (31) 11.46; (32) 12.415; (33) 13.37; (34) 14.325; (35) 15.28; (36) 16.235; (37) 17.19; (38) 18.145; (39) 19.1.

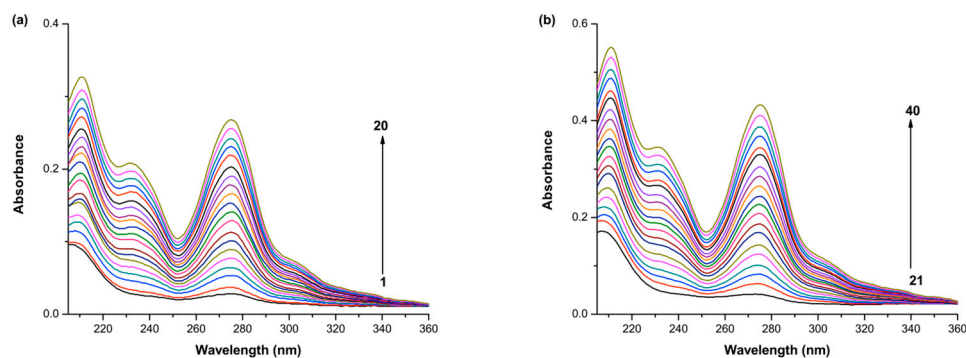

**Figure S8.** Absorption spectra of iron(III)–3,4,7,8-tetramethyl-1,10-Phenanthroline complex in methanol solution. **(a)** For spectra 1 to 20,  $[\text{Fe(III)}] = 2.934 \mu\text{M}$  and 3,4,7,8-Tetramethyl-1,10-Phenanthroline concentration ( $\mu\text{M}$ ): (1) 0.305; (2) 0.609; (3) 0.914; (4) 1.218; (5) 1.523; (6) 1.828; (7) 2.132; (8) 2.437; (9) 2.741; (10) 3.046; (11) 3.351; (12) 3.655; (13) 3.960; (14) 4.264; (15) 4.569; (16) 4.874; (17) 5.178; (18) 5.483; (19) 5.787; (20) 6.092. **(b)** For spectra 21 to 40,  $[\text{Fe(III)}] = 5.868 \mu\text{M}$  and 3,4,7,8-Tetramethyl-1,10-Phenanthroline concentration ( $\mu\text{M}$ ): (21) 0.609; (22) 1.218; (23) 1.828; (24) 2.437; (25) 3.046; (26) 3.655; (27) 4.264; (28) 4.874; (29) 5.483; (30) 6.092; (31) 6.701; (32) 7.310; (33) 7.920; (34) 8.529; (35) 9.138; (36) 9.747; (37) 10.356; (38) 10.966; (39) 11.575; (40) 12.184.

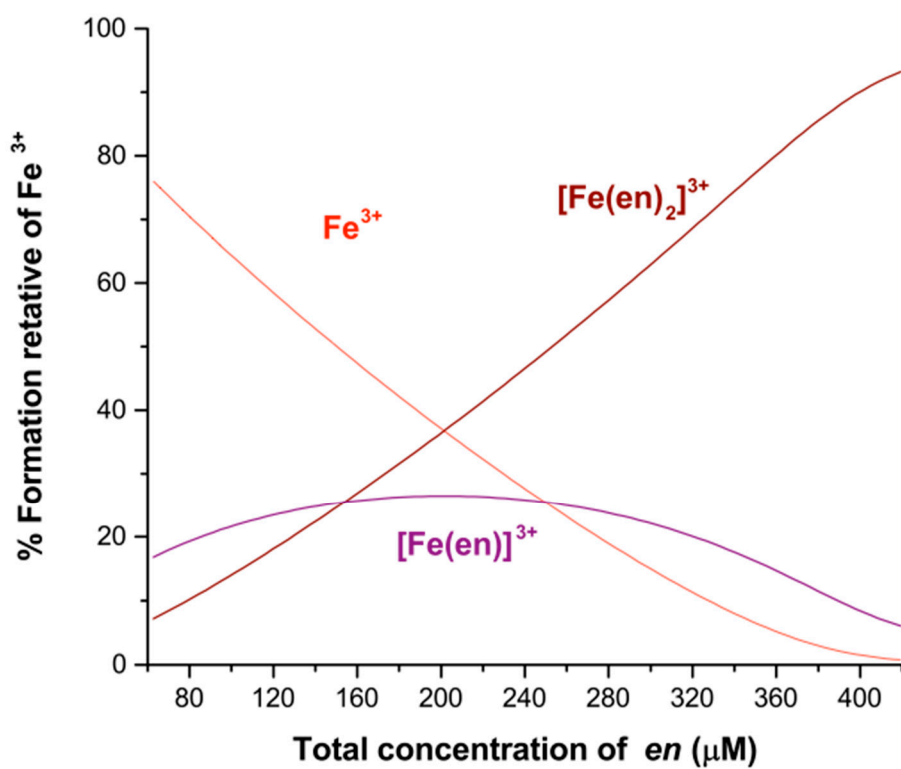

**Figure S9.** Formation curves of the iron(III)-ethylenediamine system in methanol.  $[\text{Fe}]^{3+} = 198 \mu\text{M}$  and ethylenediamine range from 62 to 420  $\mu\text{M}$ .

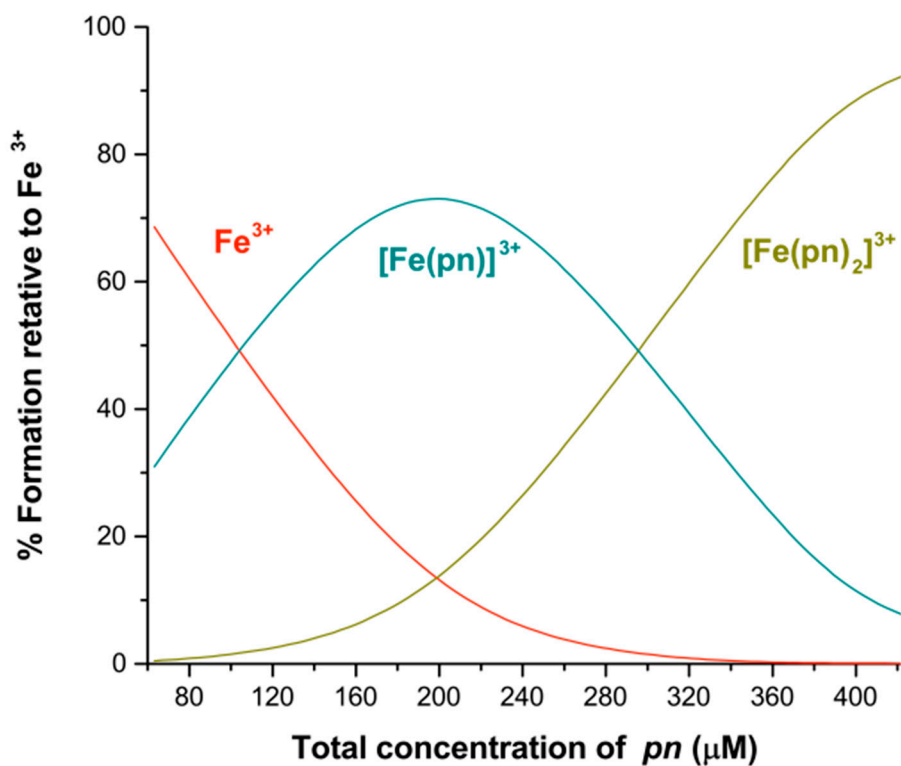

**Figure S10.** Formation curves of the iron(III)-1,3-propanediamine system in methanol.  $[\text{Fe}]^{3+} = 198 \mu\text{M}$  and 1,3-propanediamine range from 63 to 0.420  $\mu\text{M}$ .

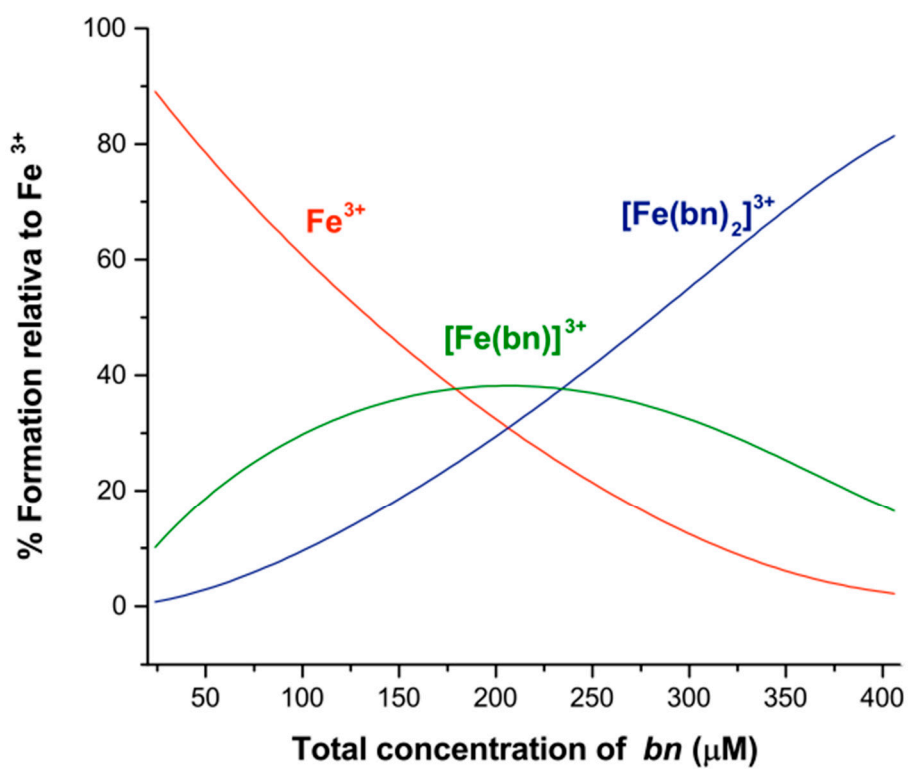

**Figure S11.** Formation curves of the iron(III)-1,4-butanediimine system in methanol.  $[\text{Fe}]^{3+} = 198 \mu\text{M}$  y 1,4-butanediimine range from 24 to 406  $\mu\text{M}$ .



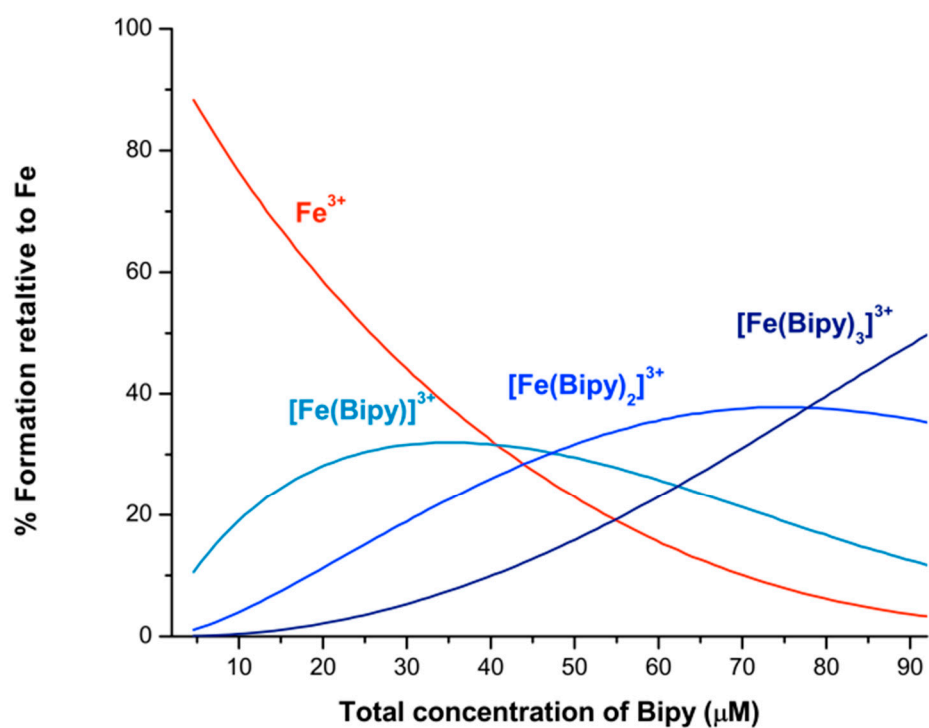

**Figure S12.** Formation curves of the Fe(III)–2,2'-bipyridyl complex in methanol.  $[\text{Fe}]^{3+} = 29.64 \mu\text{M}$  and 2,2'-Bipyridyl range from 4.6 to 92  $\mu\text{M}$ .

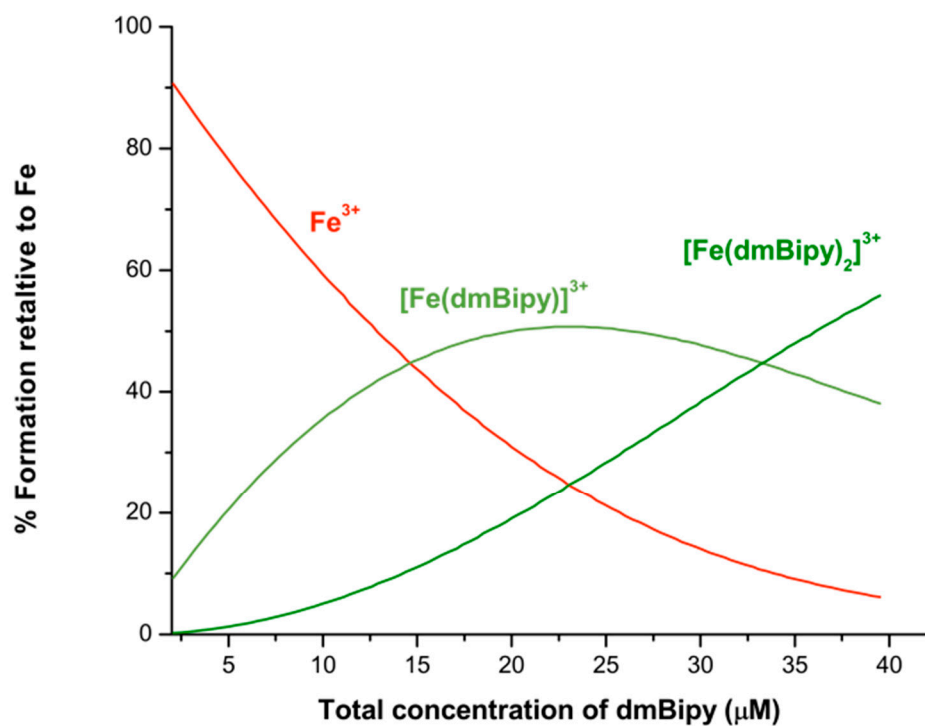

**Figure S13.** Formation curves of the Fe(III)–5,5′-dimethyl-2,2′-bipyridyl complex in methanol.  $[\text{Fe}]^{3+} = 19.8 \mu\text{M}$  and 5,5′-dimethyl-2,2′-bipyridyl range from 2.08 to 41.6  $\mu\text{M}$ .

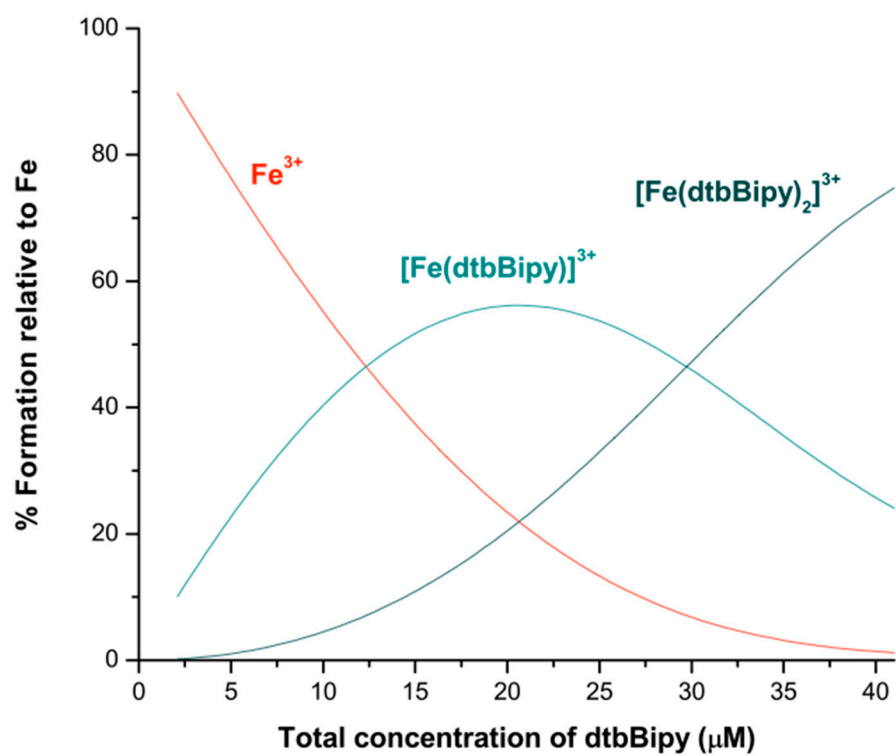

**Figure S14.** Formation curves of the Fe(III)–4,4′-di-tert-butyl-2,2′-bipyridyl complex in methanol.  $[\text{Fe}]^{3+} = 19.8 \mu\text{M}$  and 4,4′-di-tert-butyl-2,2′-bipyridyl range from 2.086 to 41.72  $\mu\text{M}$ .

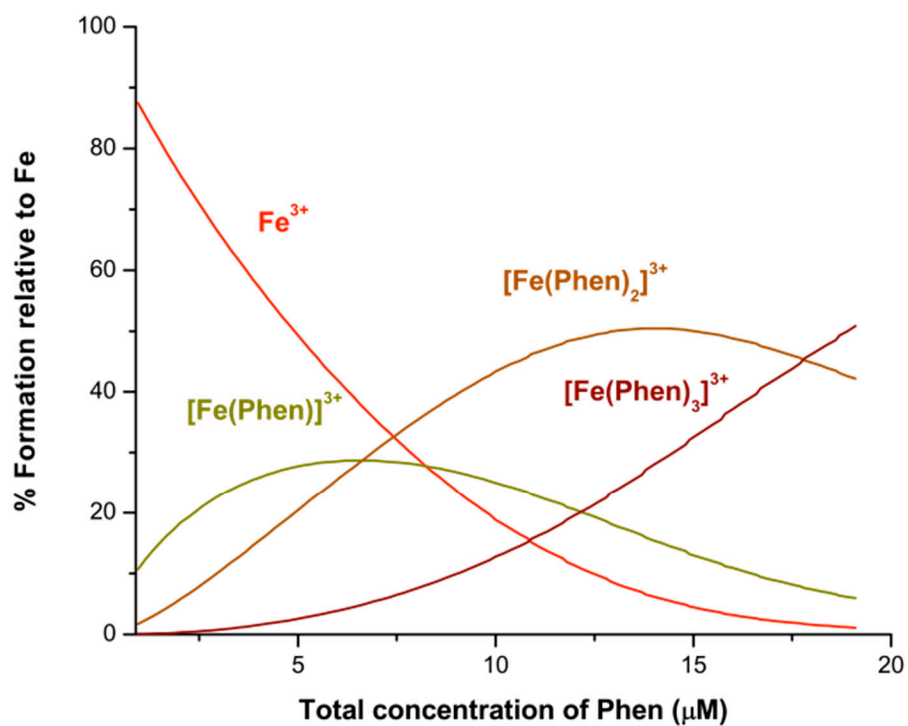

**Figure S15.** Formation curves of the Fe(III)–1,10-phenanthroline complex in methanol.  $[\text{Fe}]^{3+} = 5.9 \mu\text{M}$  and 1,10-phenanthroline range from 0.955 to 19.1  $\mu\text{M}$ .

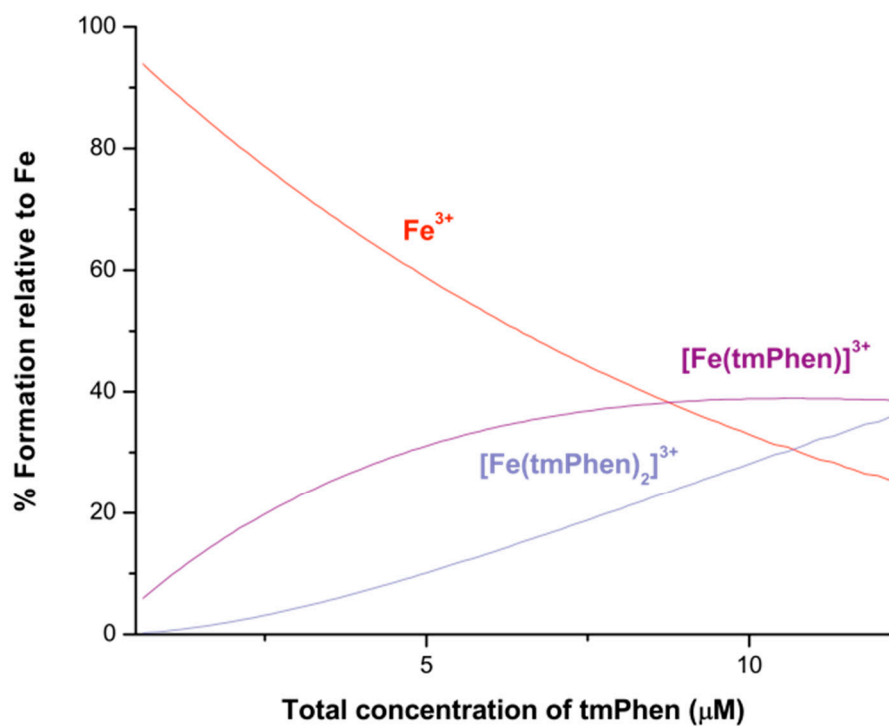

**Figure S16.** Formation curves of the Fe(III)– 3,4,7,8-tetramethyl-1,10-phenanthroline complex in methanol.  $[\text{Fe}]^{3+} = 5.86 \mu\text{M}$  and 3,4,7,8-tetramethyl-1,10-phenanthroline range from 0.6092 to 12.18  $\mu\text{M}$ .

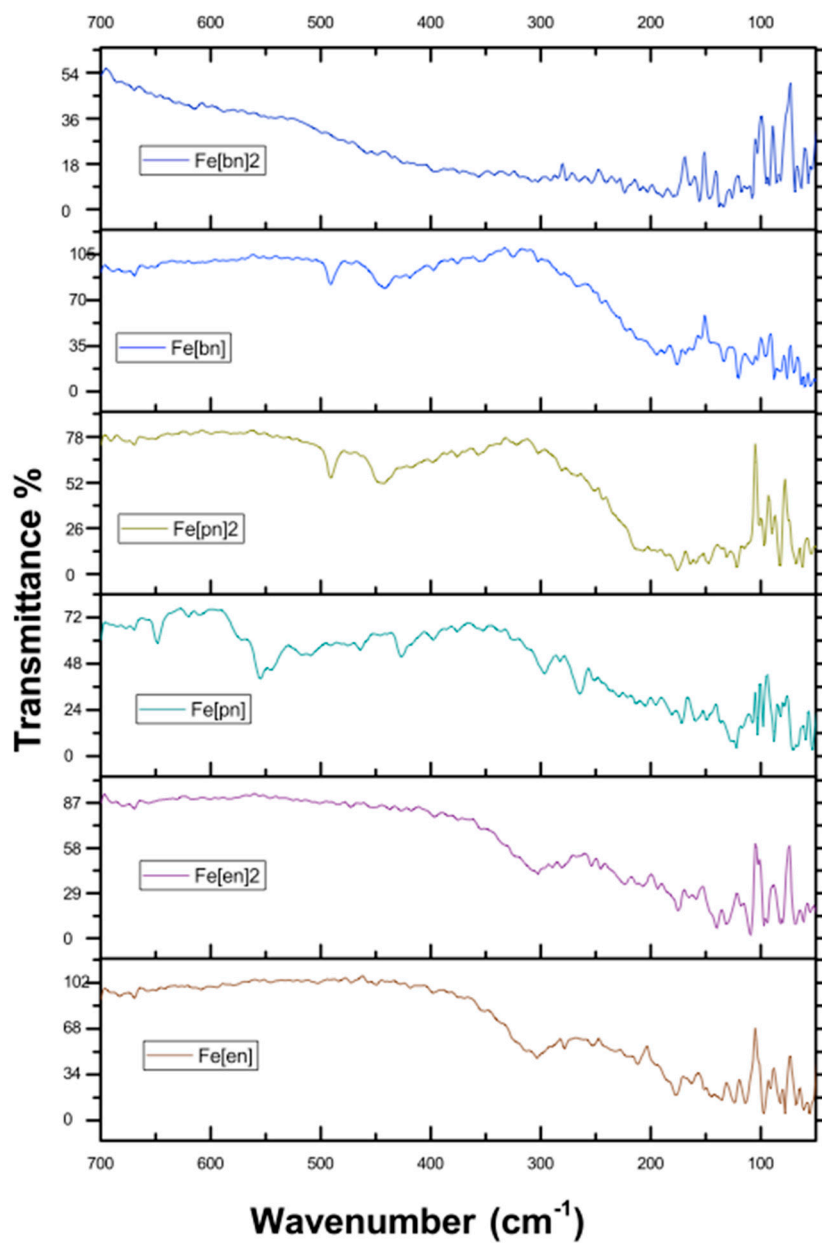

**Figure S17.** Far infrared spectra of the different Fe(III) complexes with ethylenediamine, 1,3-propanediamine and 1,4-butanediamine.

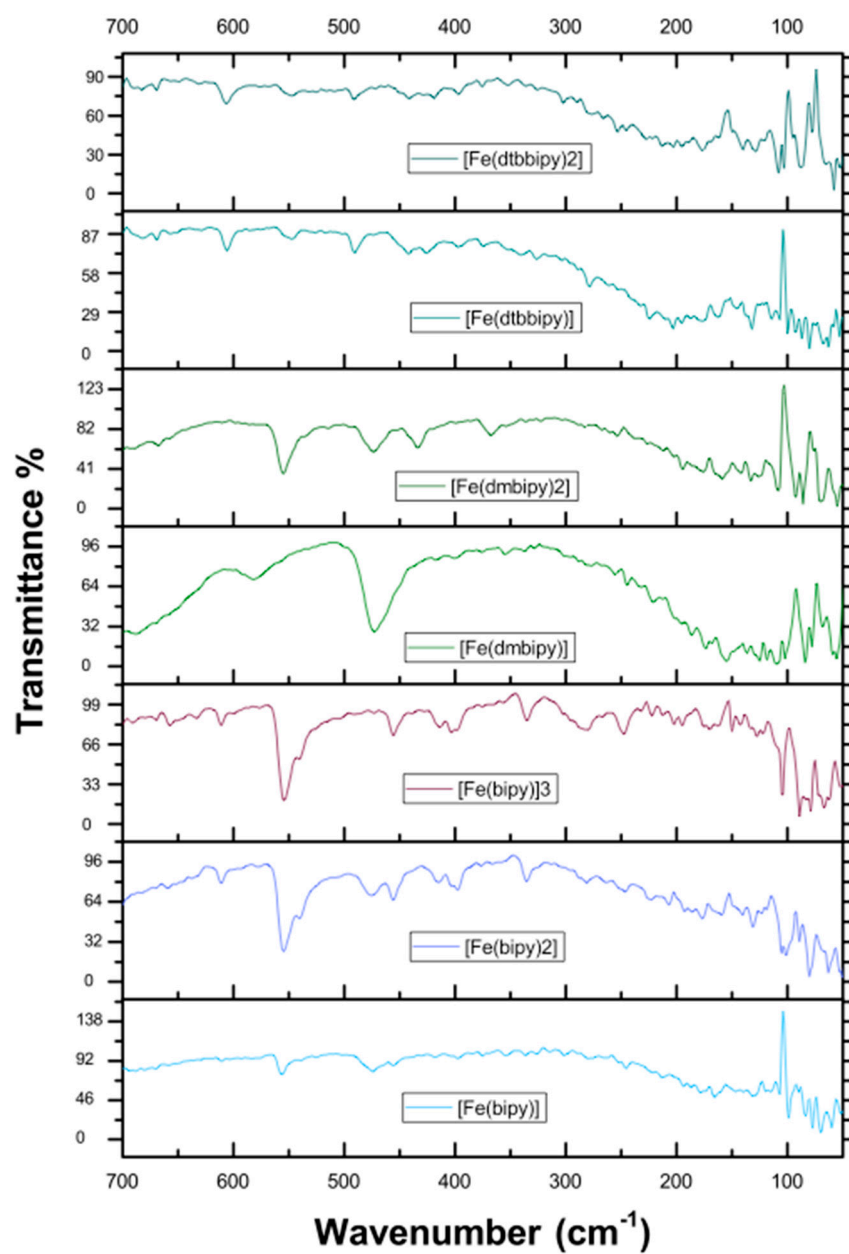

**Figure S18.** Far infrared spectra of the different Fe(III) complexes with 2,2'-bipyridyl, 5,5-dimethyl-2,2'-bipyridyl, 4,4'-di-tert-butyl-2,2'-bipyridyl.

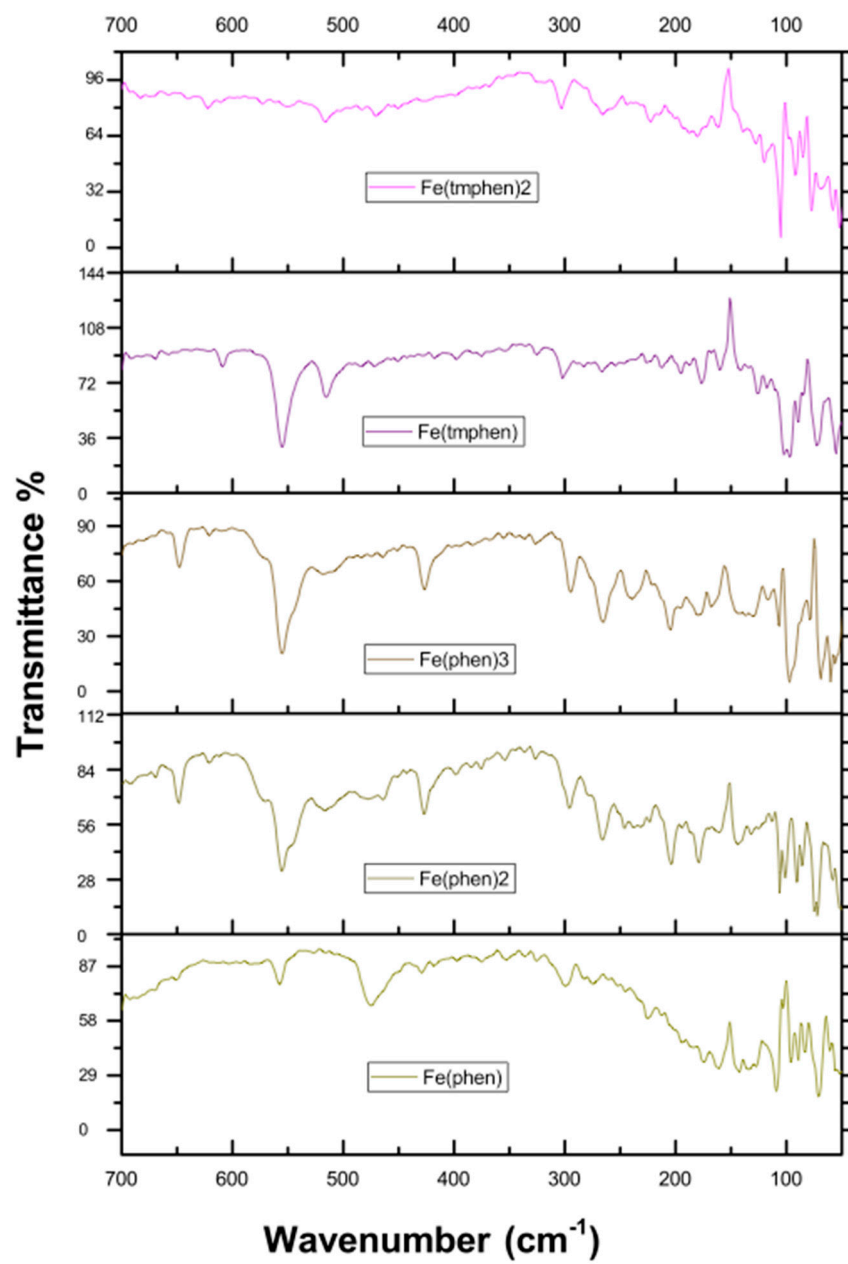

**Figure S19.** Far infrared spectra of the different Fe(III) complexes with 1,10-phenanthroline or 3,4,7,8-tetramethyl-1,10-phenanthroline.



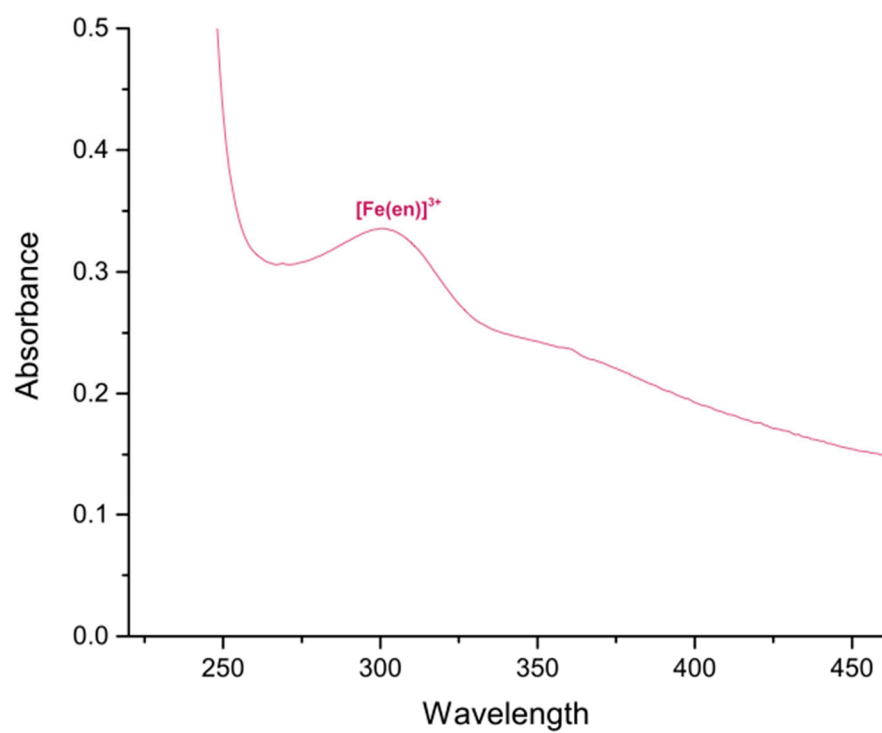

**Figure S20.** UV-vis spectra of  $[\text{Fe}(\text{en})]^{3+}$  complex in methanol solution.

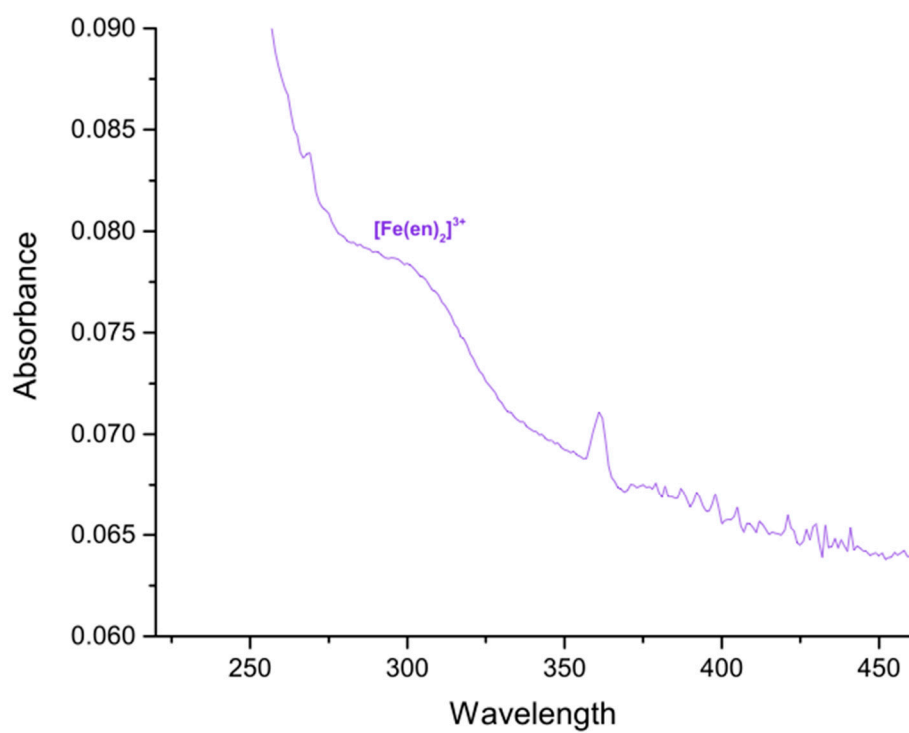

**Figure S21.** UV-vis spectrum of  $[\text{Fe}(\text{en})_2]^{3+}$  complex in methanol solution.

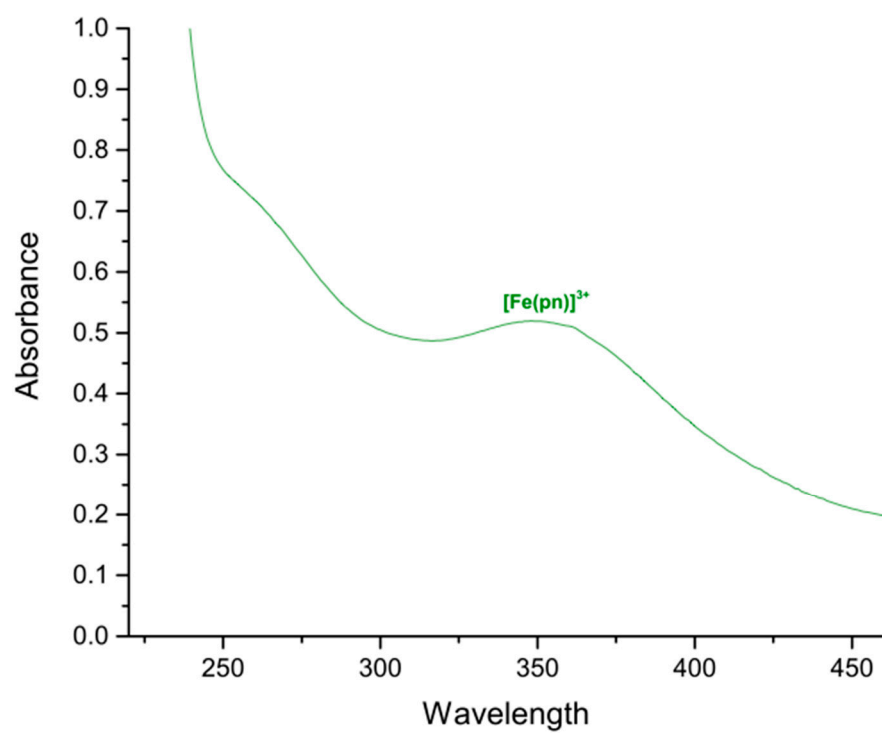

**Figure S22.** UV-vis spectrum of  $[\text{Fe}(\text{pn})]^{3+}$  complex in methanol solution.

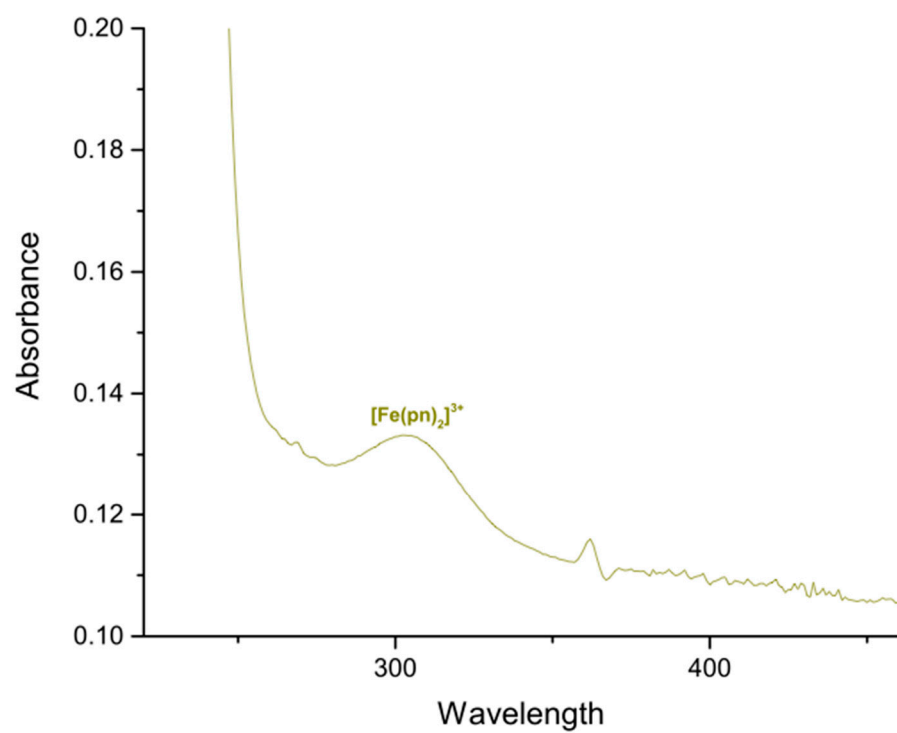

**Figure S23.** UV-vis spectrum of  $[\text{Fe}(\text{pn})_2]^{3+}$  complex in methanol solution.

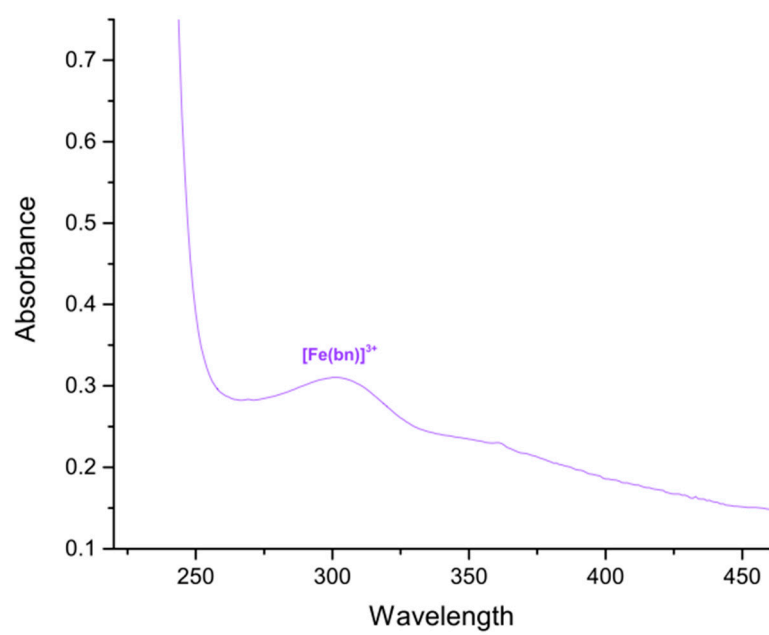

**Figure S24.** UV-vis spectrum of  $[\text{Fe}(\text{bn})]^{3+}$  complex in methanol solution.

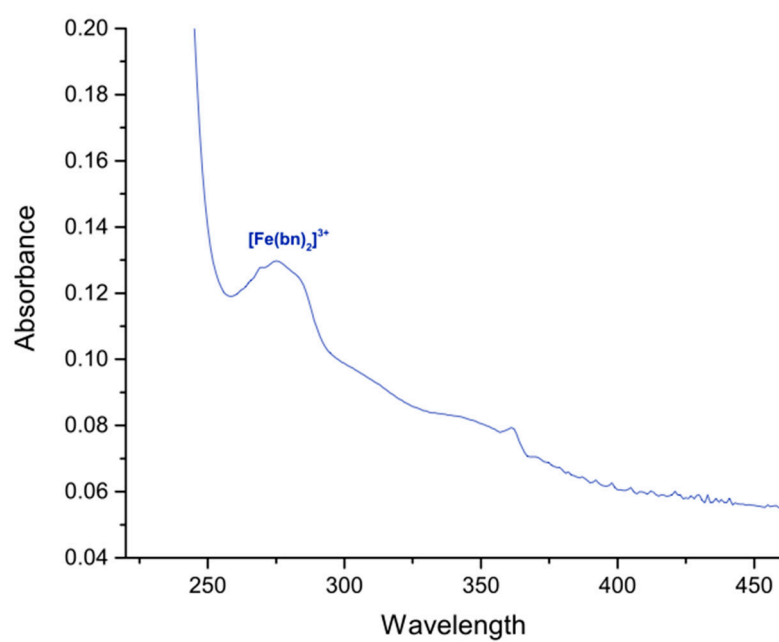

**Figure S25.** UV-vis spectrum of  $[\text{Fe}(\text{bn})_2]^{3+}$  complex in methanol solution.

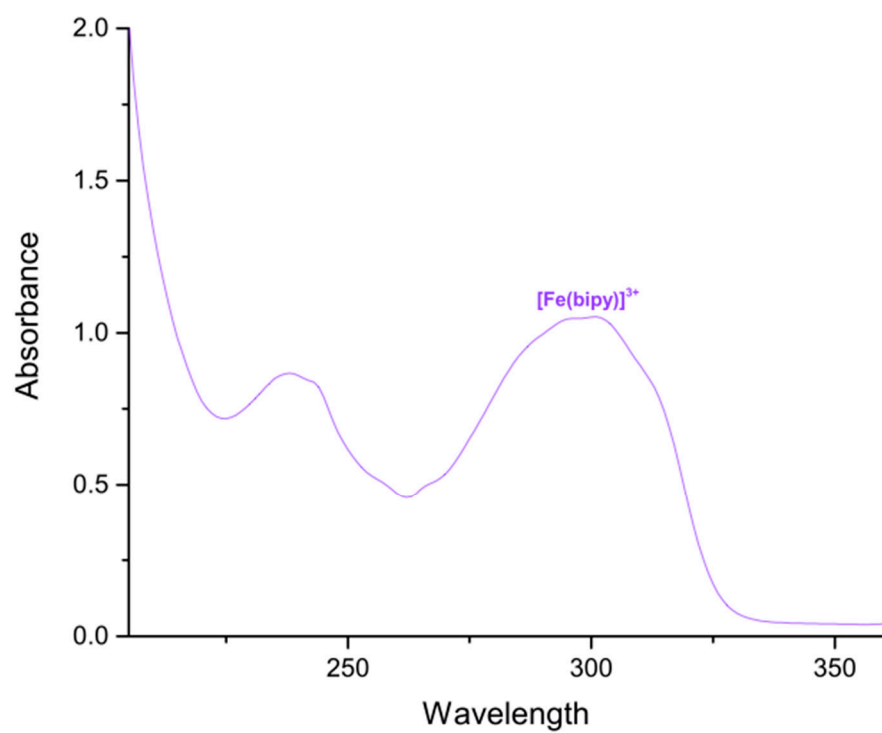

**Figure S26.** UV-vis spectrum of  $[\text{Fe}(\text{bipy})]^{3+}$  complex in methanol solution.

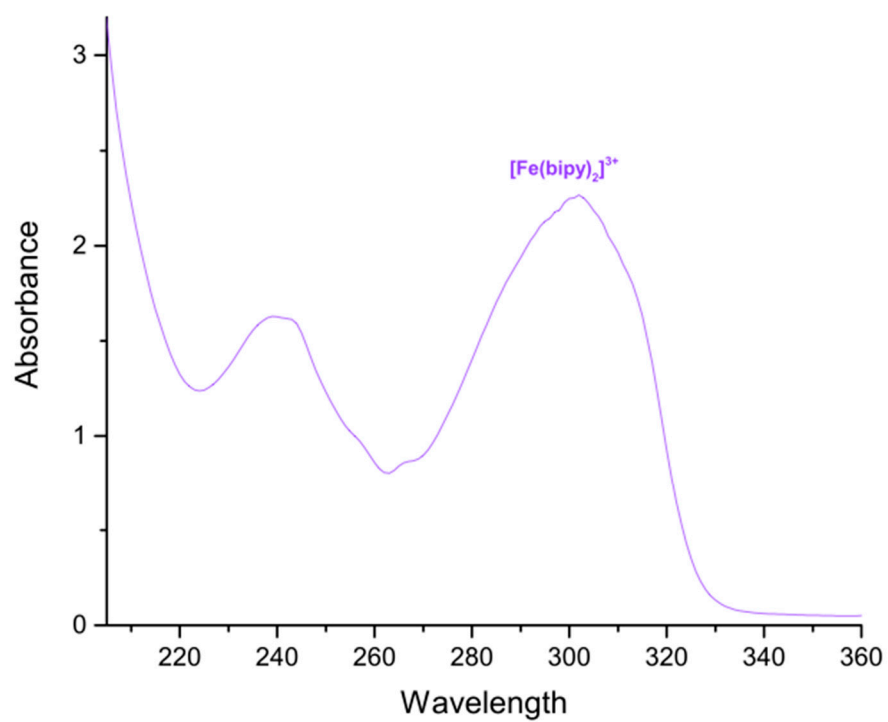

**Figure S27.** UV-vis spectrum of  $[\text{Fe}(\text{bipy})_2]^{3+}$  complex in methanol solution.



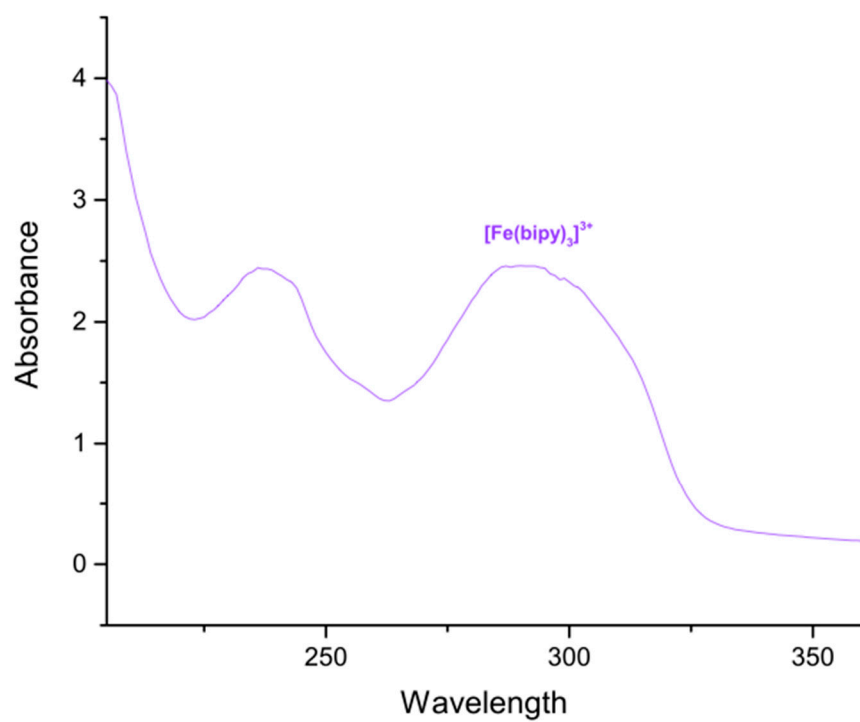

**Figure S28.** UV-vis spectrum of  $[\text{Fe}(\text{bipy})_3]^{3+}$  complex in methanol solution.

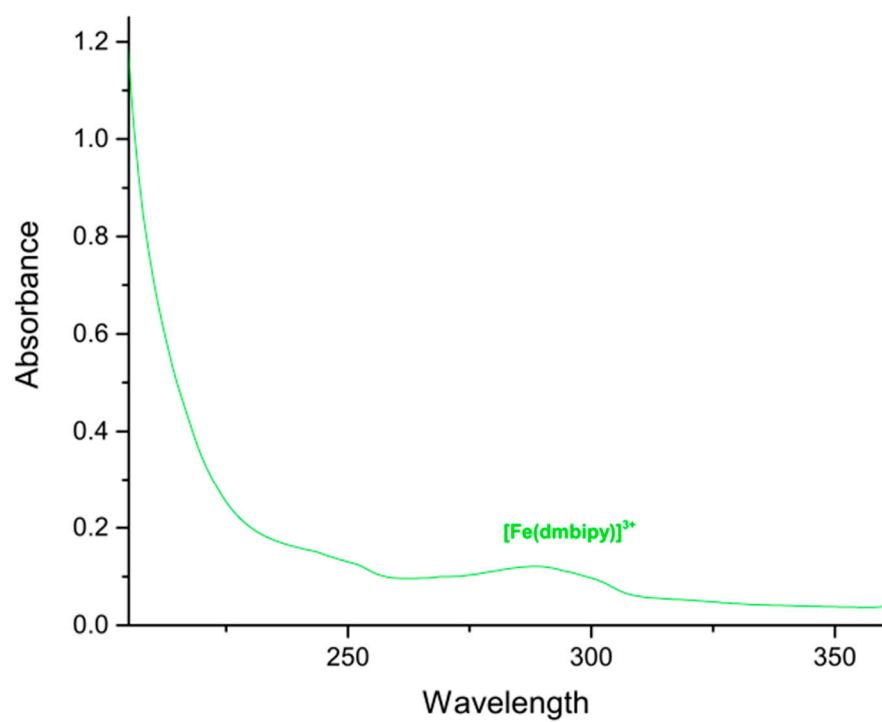

**Figure S29.** UV-vis spectrum of  $[\text{Fe}(\text{dmbipy})]^{3+}$  complex in methanol solution.

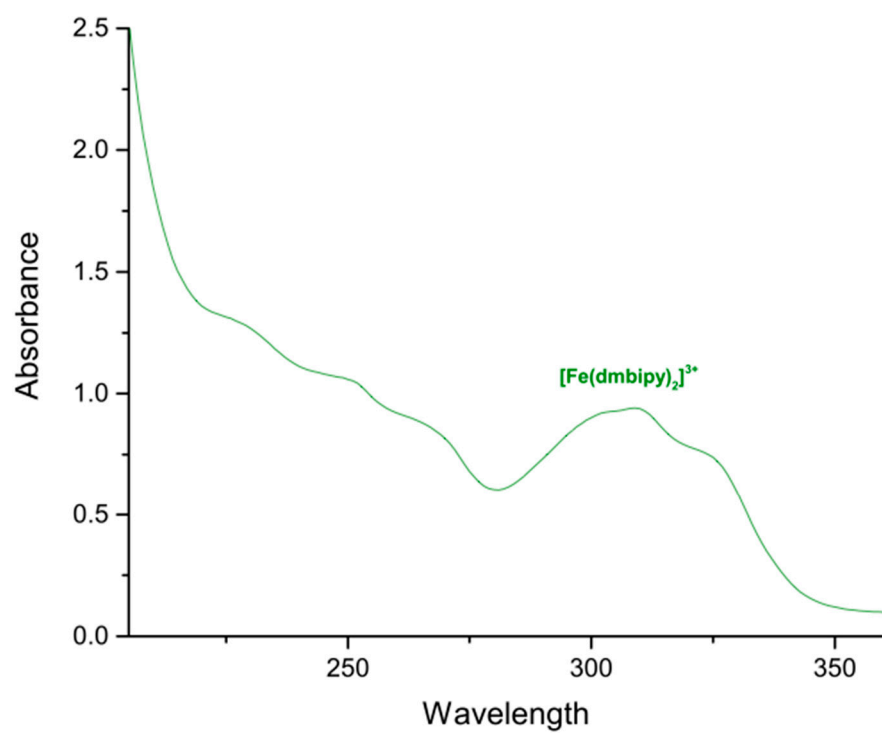

**Figure S30.** UV-vis spectrum of  $[\text{Fe}(\text{dmbipy})_2]^{3+}$  complex in methanol solution.

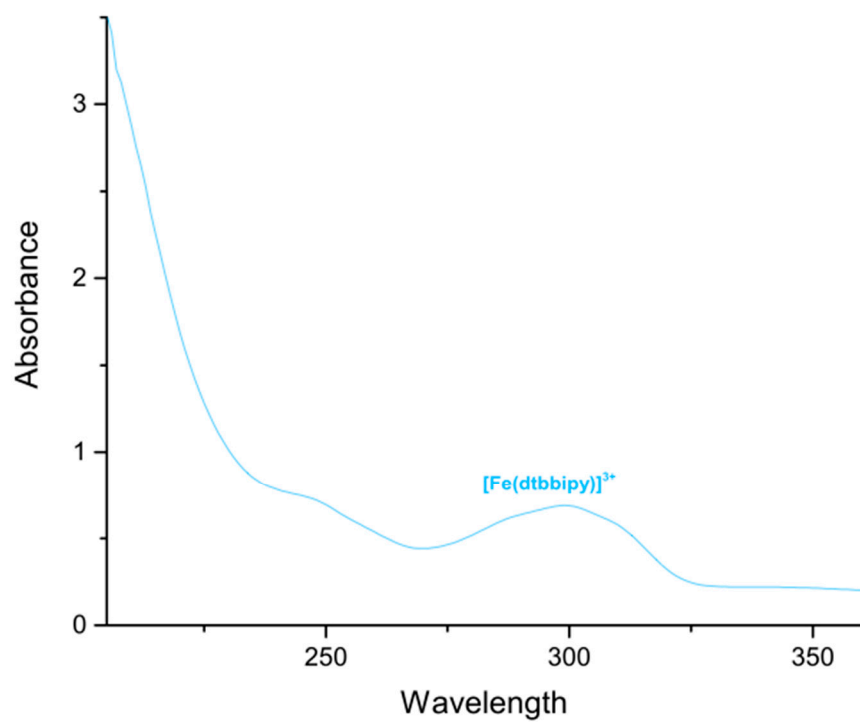

**Figure S31.** UV-vis spectrum of [Fe(dtbbipy)]<sup>3+</sup> complex in methanol solution.

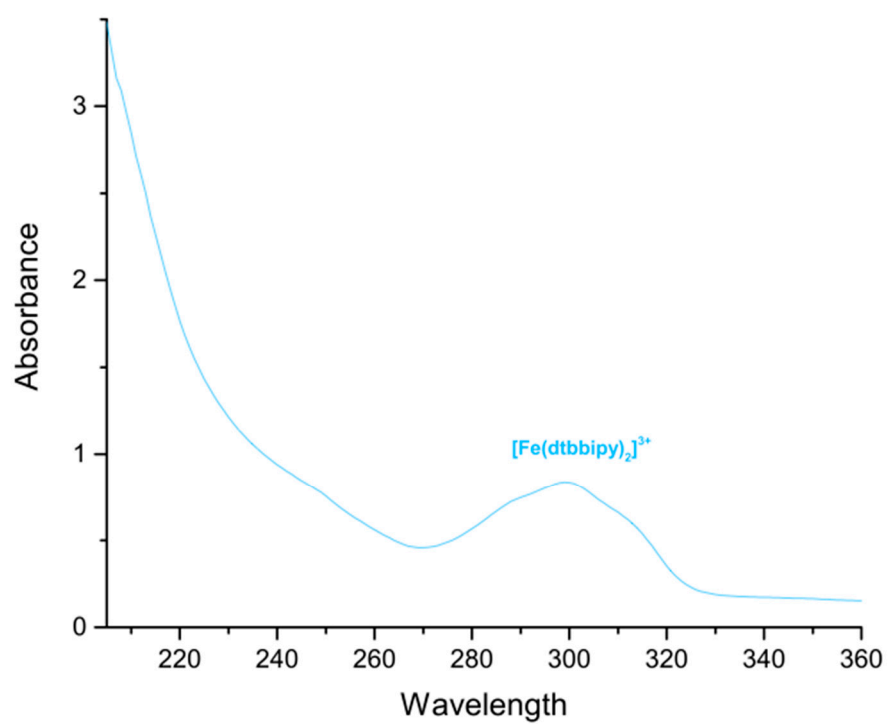

**Figure S32.** UV-vis spectrum of  $[\text{Fe}(\text{dtbbipy})_2]^{3+}$  complex in methanol solution.

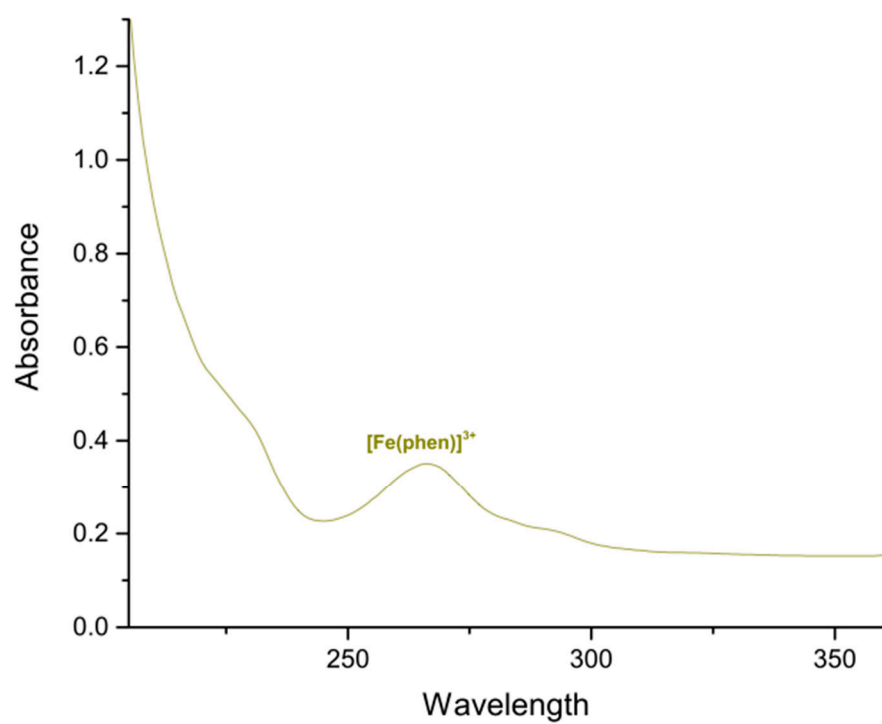

**Figure S33.** UV-vis spectrum of  $[\text{Fe}(\text{phen})]^{3+}$  complex in methanol solution.

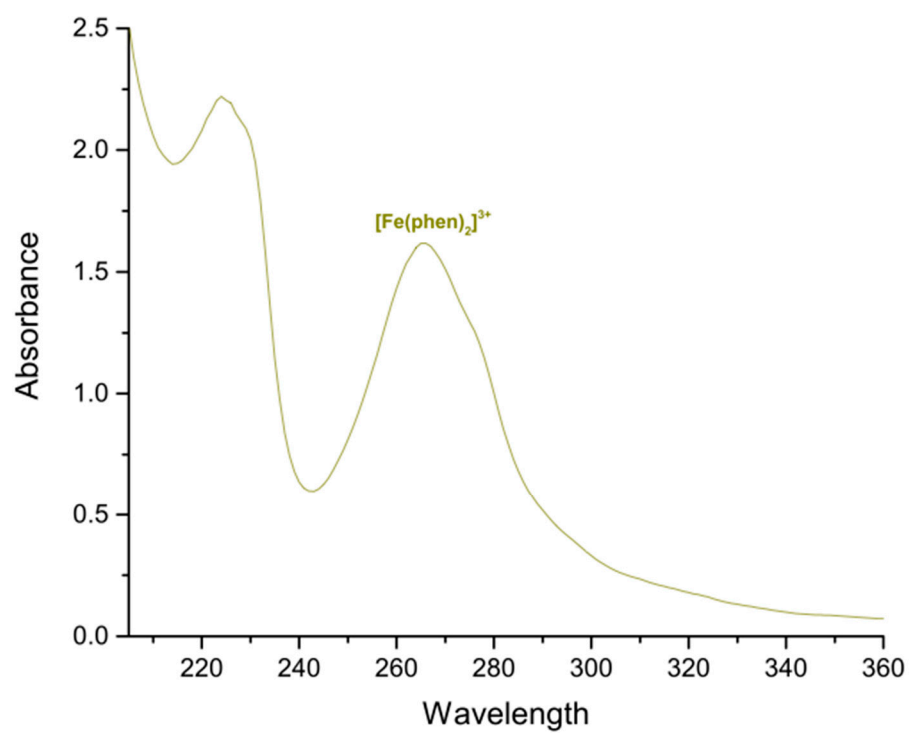

**Figure S34.** UV-vis spectrum of  $[\text{Fe}(\text{phen})_2]^{3+}$  complex in methanol solution.

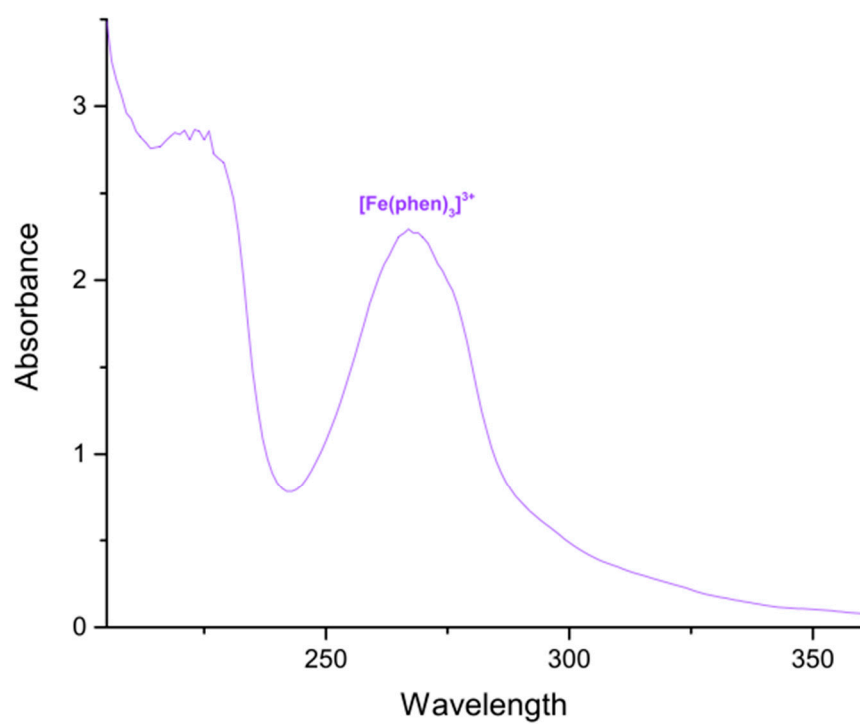

**Figure S35.** UV-vis spectrum of  $[\text{Fe}(\text{phen})_3]^{3+}$  complex in methanol solution.



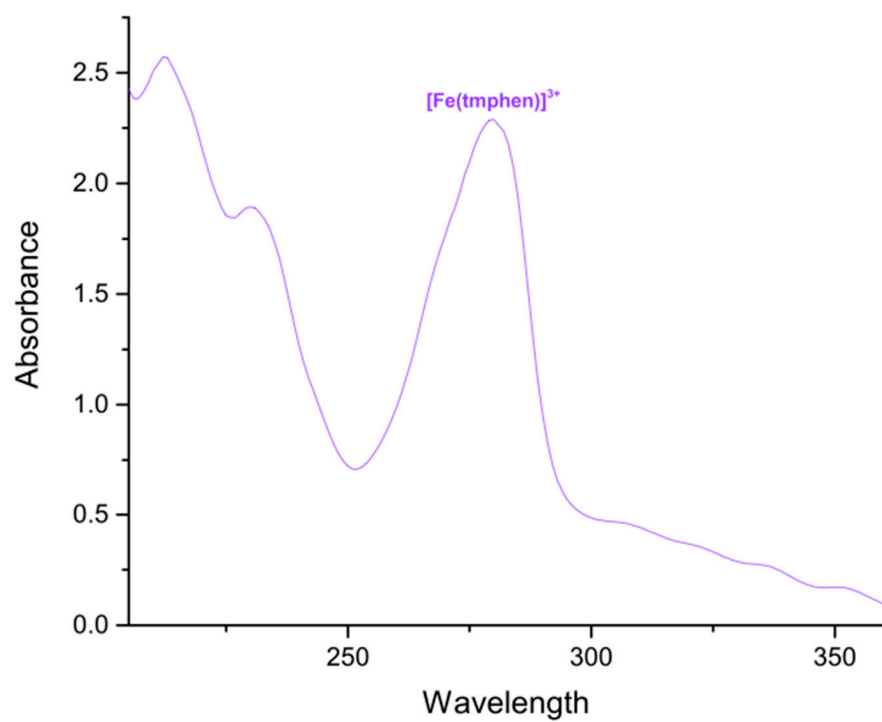

**Figure S36.** UV-vis spectrum of  $[\text{Fe}(\text{tmphen})]^{3+}$  complex in methanol solution.

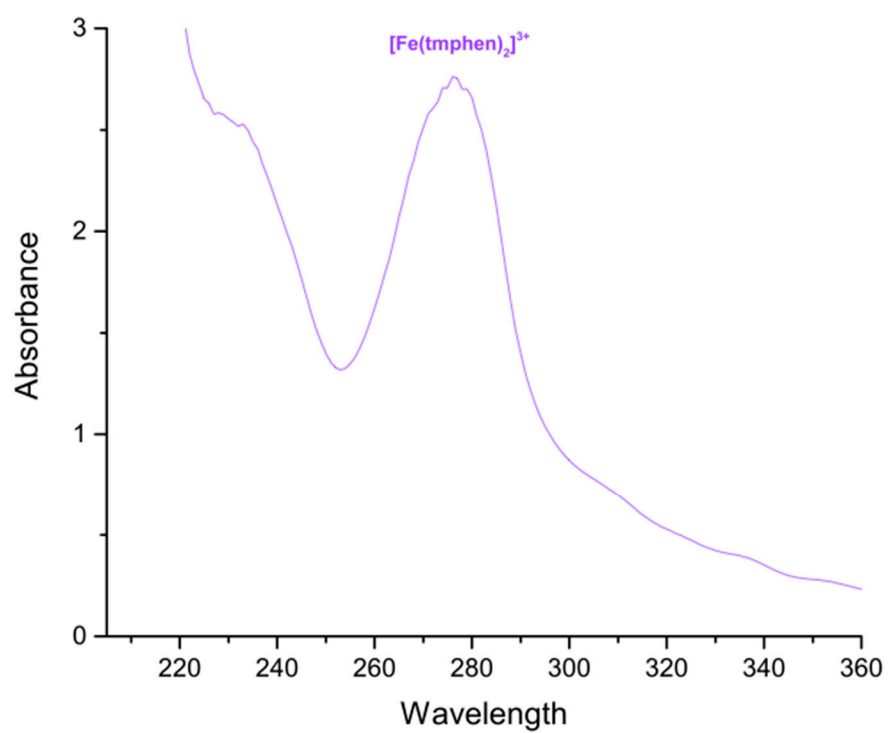

**Figure S37.** UV-vis spectrum of  $[\text{Fe}(\text{tmphen})_2]^{3+}$  complex in methanol solution.
